# Supplementary material for: Impact of Arctic Amplification variability on the chemical composition of the snowpack in Svalbard
Source: Copernicus journal article supplement (doi:10.5194/egusphere-2024-1393), 2024-06-17
Supplement: Supplementary file 1 [file egusphere-2024-1393-supplement.pdf]

# Impact of Arctic Amplification variability on the chemical composition of the snowpack in Svalbard

Azzurra Spagnesi<sup>a,b</sup>, Elena Barbaro<sup>a,b</sup> \*, Matteo Feltracco<sup>a,b</sup>, Federico Scotto<sup>c,b</sup>, Marco Vecchiato<sup>b</sup>, Massimiliano Vardè<sup>a</sup>, Mauro Mazzola<sup>a</sup>, François Burgay<sup>d,e</sup>, Federica Bruschi<sup>f</sup>, Clara Jule Marie Hoppe<sup>g</sup>, Allison Bailey<sup>g</sup>, Andrea Gambaro<sup>a,b</sup>, Carlo Barbante<sup>a,b</sup>, Andrea Spolaor<sup>a,b</sup>

<sup>a</sup> Institute of Polar Sciences - National Research Council of Italy (ISP-CNR), Via Torino 155, 30172, Venice, Italy

<sup>b</sup> Department of Environmental Sciences, Informatics and Statistics, Ca' Foscari University of Venice, Via Torino 155, 30172, Venice, Italy

<sup>c</sup> Institute of Atmospheric Sciences and Climate - National Research Council of Italy (ISAC-CNR), Campus Ecotekne, Lecce, 73100, Italy

<sup>d</sup> Laboratory of Environmental Chemistry (LUC), Paul Scherrer Institut (PSI), Villigen, 5232, Switzerland

<sup>e</sup> Oeschger Centre for Climate Change Research, University of Bern, Bern, 3012, Switzerland

<sup>f</sup> Department of Chemistry, Biology and Biotechnology, University of Perugia, Via dell'Elce di Sotto 8, 06123, Perugia, Italy

<sup>g</sup> Alfred Wegener Institute, Helmholtz Centre for Polar and Marine Research, 27570 Bremerhaven, Germany

Corresponding: Elena Barbaro<sup>a,b</sup> ([elena.barbaro@cnr.it](mailto:elena.barbaro@cnr.it))

**Table S1.** Average ionic loads of major ions and trace elements present with percentage lower than 1% in the surface snow collected at GSRS during each season of the three consecutive sampling campaigns. In the brackets the standard deviation is reported.

| $\mu\text{g m}^{-2}$  | MSA       | Ag          | Al          | As    | Ba          | Be          | Bi          | Cd        | Cs        | Cr      | Co        | Cu        | Li      | Mn        | Ni        | Pb      | Rb      | Se        | Sr        | Tl          | U         | V         | Zn          |
|-----------------------|-----------|-------------|-------------|-------|-------------|-------------|-------------|-----------|-----------|---------|-----------|-----------|---------|-----------|-----------|---------|---------|-----------|-----------|-------------|-----------|-----------|-------------|
| <b>autumn 2018</b>    | 5 (4)     | 0.04 (0.08) | 963 (1317)  | 1 (1) | 12 (15)     | 0.1 (0.1)   | 0.7 (1.9)   | 0.1 (0.1) | 0.3 (0.6) | 11 (15) | 1 (2)     | 10 (21)   | 2 (3)   | 39 (71)   | 20 (20)   | 4 (4)   | 3 (5)   | 0.5 (0.5) | 18 (20)   | 0.03 (0.04) | 0.1 (0.2) | 4 (5)     | 27 (31)     |
| <b>winter 2018-19</b> | 8 (5)     | 0.06 (0.07) | 345 (191)   | 2 (1) | 64 (353)    | 0.02 (0.02) | 0.2 (0.2)   | 0.4 (0.3) | 0.1 (0.1) | 5 (5)   | 0.3 (0.2) | 17 (13)   | 2 (2)   | 14 (11)   | 13 (21)   | 60 (53) | 2 (1)   | 2 (2)     | 57 (50)   | 0.03 (0.03) | 0.1 (0)   | 2 (2)     | 56 (59)     |
| <b>spring 2019</b>    | 106 (137) | 0.06 (0.04) | 742 (753)   | 1 (1) | 17 (18)     | 0.05 (0.08) | 0.7 (1.8)   | 0.4 (0.3) | 0.2 (0.3) | 19 (32) | 1 (1)     | 133 (239) | 2 (2)   | 53 (91)   | 31 (32)   | 70 (41) | 2 (3)   | 1 (1)     | 45 (36)   | 0.03 (0.04) | 0.2 (0.2) | 5 (3)     | 118 (199)   |
| <b>autumn 2019</b>    | 72 (46)   | 0.03 (0.01) | 893 (1006)  | 1 (1) | 28 (33)     | 0.22 (0.25) | 0.3 (0.2)   | 0.1 (0.1) | 0.2 (0.3) | 18 (12) | 2 (1)     | 44 (34)   | 15 (14) | 156 (229) | 44 (34)   | 3 (1)   | 3 (3)   | 5 (4)     | 117 (139) | 0.21 (0.23) | 0.1 (0.2) | 7 (8)     | 101 (148)   |
| <b>winter 2019-20</b> | 36 (19)   | 0.06 (0.1)  | 2207 (3752) | 3 (7) | 32 (35)     | 0.41 (0.72) | 0.4 (0.4)   | 0.3 (0.3) | 0.5 (0.7) | 23 (18) | 3 (11)    | 32 (49)   | 9 (8)   | 170 (230) | 32 (49)   | 8 (10)  | 5 (6)   | 9 (11)    | 163 (138) | 0.15 (0.11) | 0.2 (0.2) | 12 (24)   | 81 (102)    |
| <b>spring 2020</b>    | 847 (690) | 0.08 (0.08) | 6460 (8276) | 3 (4) | 59 (73)     | 0.92 (1.12) | 0.6 (0.3)   | 0.3 (0.3) | 1.5 (1.9) | 25 (11) | 5 (6)     | 131 (401) | 16 (16) | 261 (319) | 131 (401) | 13 (14) | 14 (17) | 18 (23)   | 180 (190) | 0.24 (0.17) | 0.7 (1)   | 20 (23)   | 182 (217)   |
| <b>autumn 2020</b>    | 73 (129)  | 0.1 (0.2)   | 1439 (2820) | 8 (7) | 1043 (2654) | 0.12 (0.12) | 0.1 (0.1)   | 0.3 (0.7) | 0.2 (0.3) | 7 (11)  | 1 (3)     | 69 (167)  | 13 (25) | 65 (92)   | 8 (18)    | 10 (17) | 5 (6)   | 9 (9)     | 284 (445) | 0.13 (0.11) | 0 (0)     | 2 (2)     | 2160 (3028) |
| <b>winter 2020-21</b> | 53 (59)   | 0.01 (0.01) | 155 (201)   | 4 (3) | 16 (36)     | 0.04 (0.04) | 0.02 (0.02) | 0.1 (0.1) | 0.1 (0.1) | 1 (1)   | 0.1 (0.1) | 4 (5)     | 1 (1)   | 7 (10)    | 0.3 (0.4) | 2 (3)   | 1 (1)   | 3 (2)     | 42 (35)   | 0.05 (0.06) | 0 (0)     | 0.3 (0.1) |             |
| <b>spring 2021</b>    | 114 (252) | 0.1 (0.1)   | 2320 (3888) | 8 (6) | 41 (57)     | 0.2 (0.29)  | 0.1 (0.2)   | 0.7 (1.9) | 0.6 (0.8) | 9 (12)  | 2 (4)     | 24 (42)   | 4 (5)   | 113 (200) | 9 (13)    | 5 (6)   | 9 (13)  | 5 (6)     | 75 (113)  | 0.14 (0.16) | 0 (0)     | 8 (9)     | 816 (556)   |

**Table S2.** Average areas ( $\text{km}^2$ ) occupied by Drift Ice (DI), Fast Ice (FI), and Open Water (OW) in March 2019, 2020, 2021 within the Kongsfjorden. Dataset: Gerland et al., 2022.

| $\text{Km}^2$   | March 2019 | March 2020 | March 2021 |
|-----------------|------------|------------|------------|
| Drift Ice (DI)  | 6.08       | 16.53      | 8.67       |
| Fast Ice (FI)   | 57.86      | 113.28     | 37.59      |
| Open Water (OW) | 86.71      | 23.80      | 106.68     |

**Table S3.** Seasonal mean air temperatures (°C), average precipitation (mm), average wind speed (m s<sup>-1</sup>), moderate wind days (5-10 m s<sup>-1</sup>), strong wind days (> 10 m s<sup>-1</sup>) and mean snow height (cm) characterizing the three consecutive sampling campaigns, from 2018-19 to 2020-21. Dataset: Norwegian Centre for Climate Services (NCCS). The “moderate” and “strong” wind speed thresholds are those established in Pilguy et al., 2019.

|                       | Mean air temperature<br>(°C) | Precipitation average<br>(mm) | Average wind speed<br>(m s <sup>-1</sup> ) | Max wind speed<br>(m s <sup>-1</sup> ) | Days with moderate<br>wind speed<br>(5-10 m s <sup>-1</sup> ) | Days with strong<br>wind speed<br>(> 10 m s <sup>-1</sup> ) | Mean snow height<br>(cm) |
|-----------------------|------------------------------|-------------------------------|--------------------------------------------|----------------------------------------|---------------------------------------------------------------|-------------------------------------------------------------|--------------------------|
| <b>autumn 2018</b>    | -3.65                        | 5.50                          | 4.14                                       | 11.98                                  | 25                                                            | 2                                                           | 20.75                    |
| <b>winter 2018-19</b> | -11.37                       | 2.56                          | 3.79                                       | 15.41                                  | 19                                                            | 3                                                           | 57.56                    |
| <b>spring 2019</b>    | -4.12                        | 2.66                          | 3.30                                       | 9.32                                   | 11                                                            | 0                                                           | 74.90                    |
| <b>autumn 2019</b>    | -8.18                        | 1.42                          | 3.21                                       | 12.39                                  | 11                                                            | 1                                                           | 15.33                    |
| <b>winter 2019-20</b> | -14.74                       | 2.09                          | 3.73                                       | 17.69                                  | 17                                                            | 6                                                           | 62.18                    |
| <b>spring 2020</b>    | -7.47                        | 2.13                          | 3.61                                       | 16.09                                  | 13                                                            | 4                                                           | 85.42                    |
| <b>autumn 2020</b>    | -4.78                        | 4.91                          | 4.11                                       | 9.72                                   | 17                                                            | 0                                                           | 17.25                    |
| <b>winter 2020-21</b> | -7.92                        | 3.25                          | 3.91                                       | 13.85                                  | 23                                                            | 5                                                           | 57.77                    |
| <b>spring 2021</b>    | -5.31                        | 1.80                          | 3.99                                       | 13.87                                  | 18                                                            | 3                                                           | 101.69                   |

**Table S4.** Averages of seawater temperatures (°C) and salinity (psu) at Kb3 in Kongsfjorden (10 m depth) in the 2019, 2020 and 2021 spring seasons.

|             | Seawater temperature (°C) | Salinity |
|-------------|---------------------------|----------|
| <b>2019</b> | 2.42                      | 34.99    |
| <b>2020</b> | -0.55                     | 34.64    |
| <b>2021</b> | 0.09                      | 34.74    |

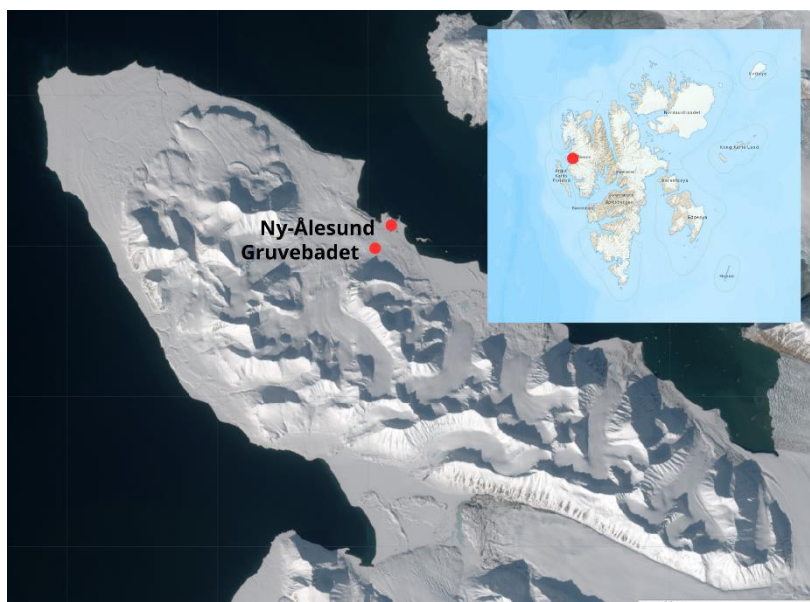

**Figure S1.** Sampling sites of Ny-Ålesund and Gruvebadet, located in the Brøgger peninsula (Svalbard Islands).

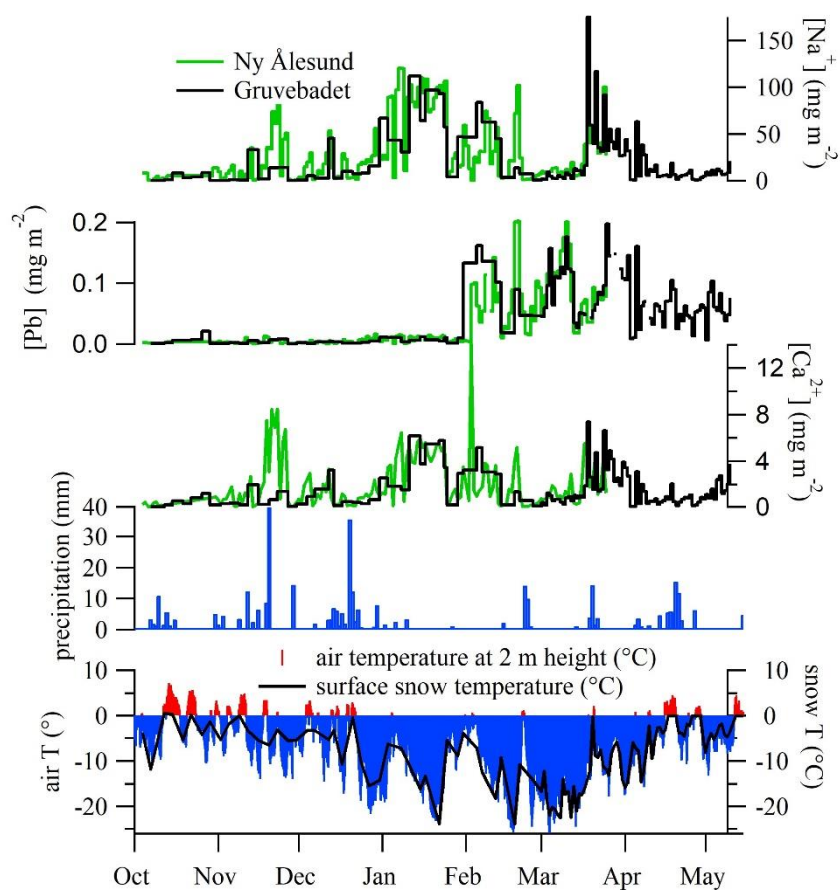

**Figure S2.** Concentration trends of sodium ( $\text{Na}^+$ ), lead ( $\text{Pb}$ ) and calcium ( $\text{Ca}^{2+}$ ) in the surface snow collected at Gruvebadet and Ny-Ålesund during 2018-2019 sampling campaign. The precipitation (in mm), the air and snow temperatures ( $^{\circ}\text{C}$ ) are reported in the graphs below.

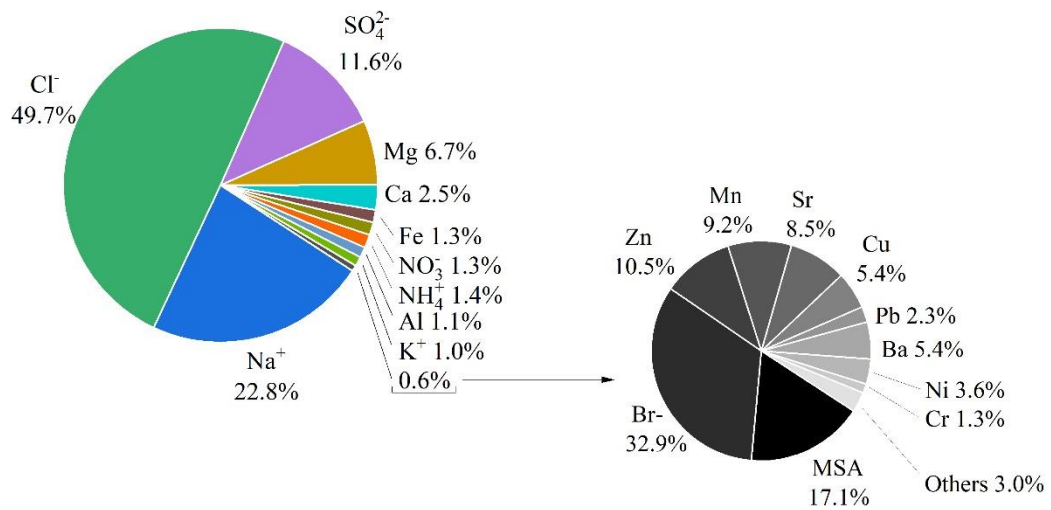

**Figure S3.** Pie diagram of average concentration of major ions and trace elements during three sampling campaigns at Gruvebadet (Svalbard Islands).

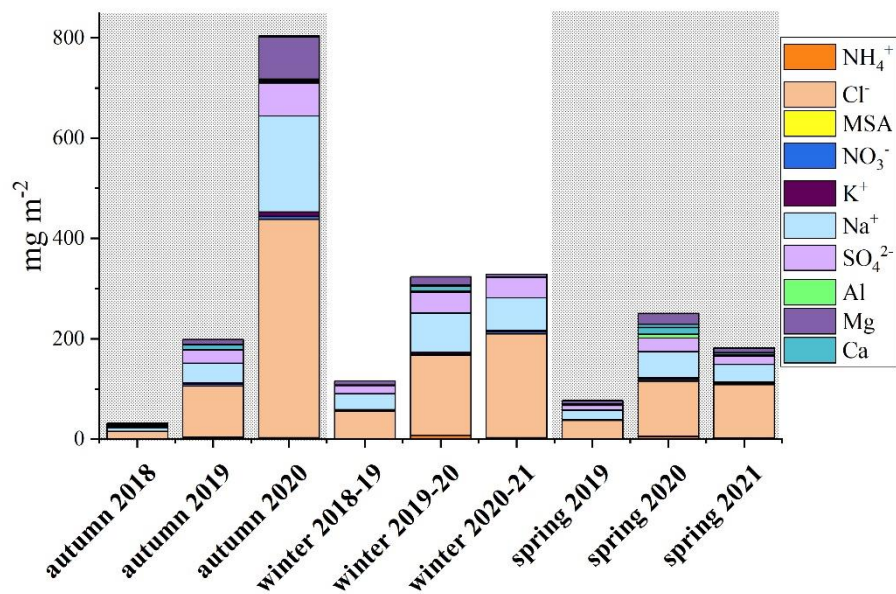

**Figure S4.** Ionic load average of major ions and trace elements in the surface snow collected at Gruvebadet during each season of the three consecutive sampling campaigns.

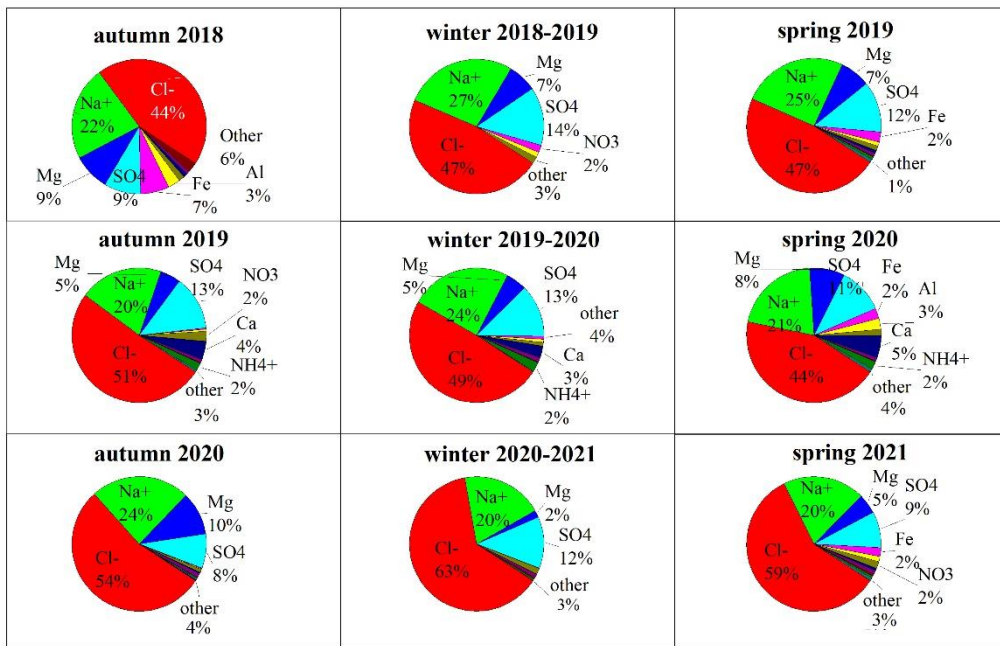

**Figure S5.** Pie diagrams of average concentrations of major ions and trace elements in the surface snow collected at Gruvebadet during each season of the three consecutive sampling campaigns.

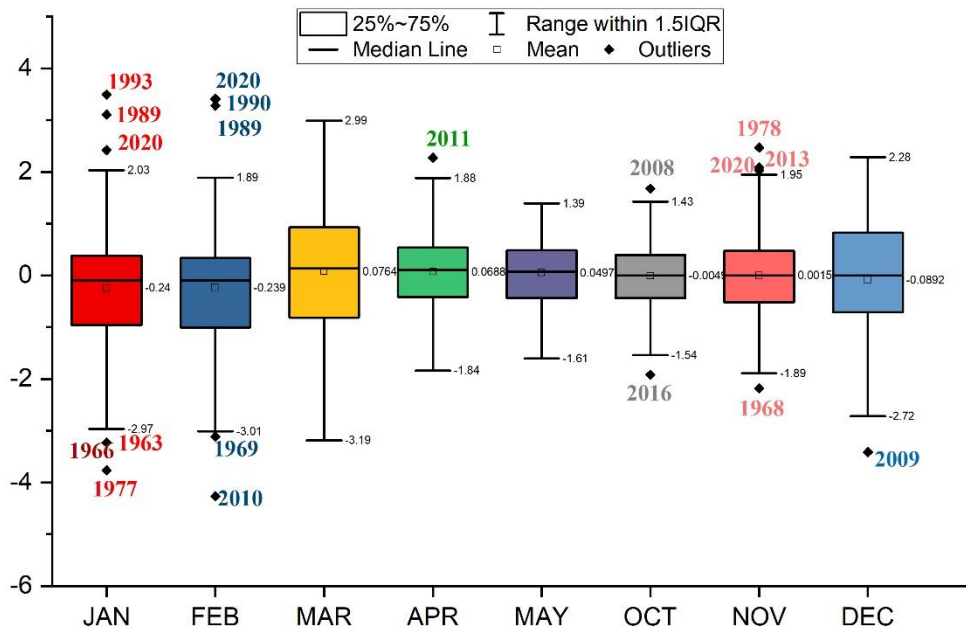

**Figure S6.** AO index boxplots on 1950 to 2021 timeframe (NOAA). January and February 2020 clearly appear as positive outliers on the reference historical timeseries.

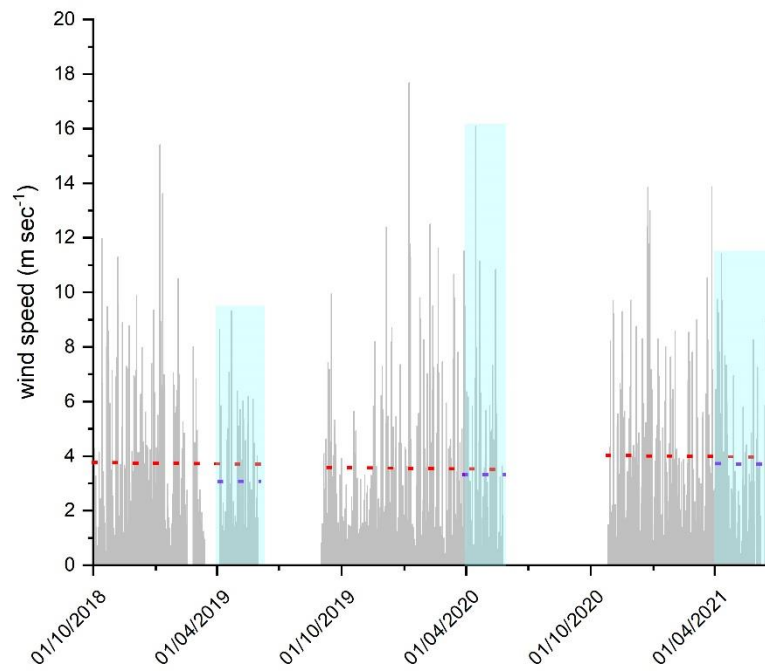

**Figure S7.** Wind speed ( $\text{m sec}^{-1}$ ) at Kongsfjorden during the three sampling campaigns (2018-19, 2019-20, 2020-21). Red dashed lines represent average wind speeds for each campaign, while blue dashed lines show the average wind speed in spring seasons. Data provided by the Norwegian Centre for Climate Services (NCCS).

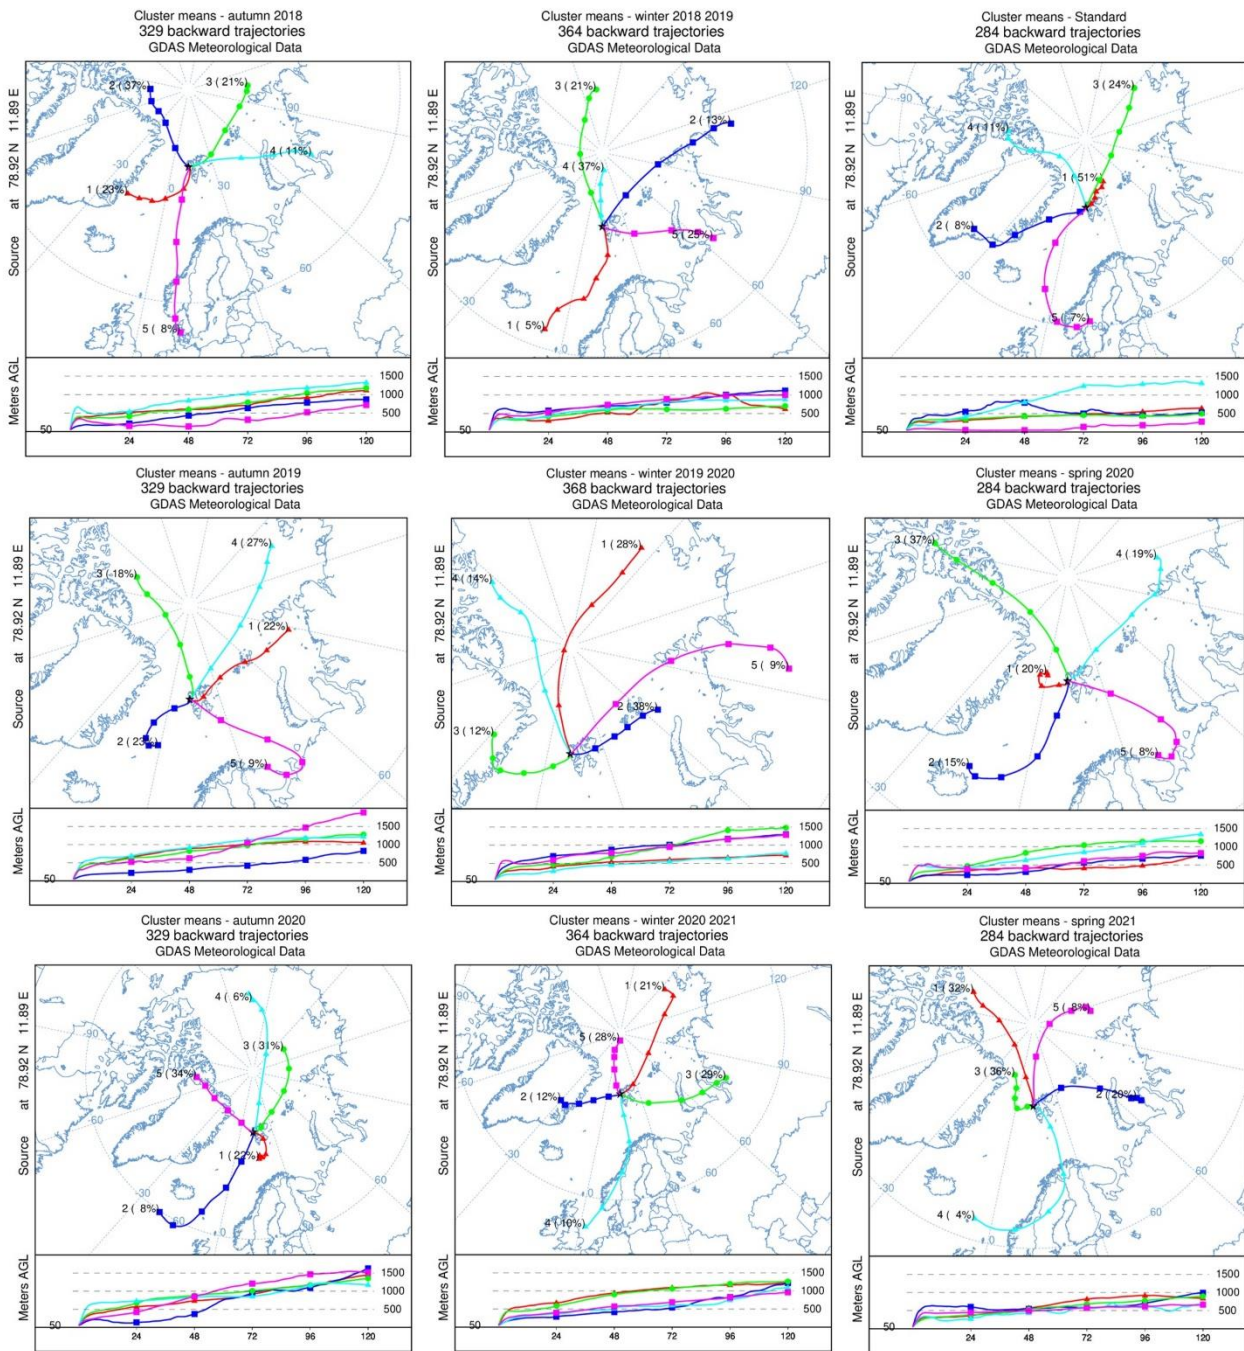

**Figure S8.** Back-trajectories computed with the HYSPLIT particle dispersion model over Ny-Ålesund, distinguished by season during the Arctic Haze period for the 2018-19, 2019-20, 2020-21 campaigns.



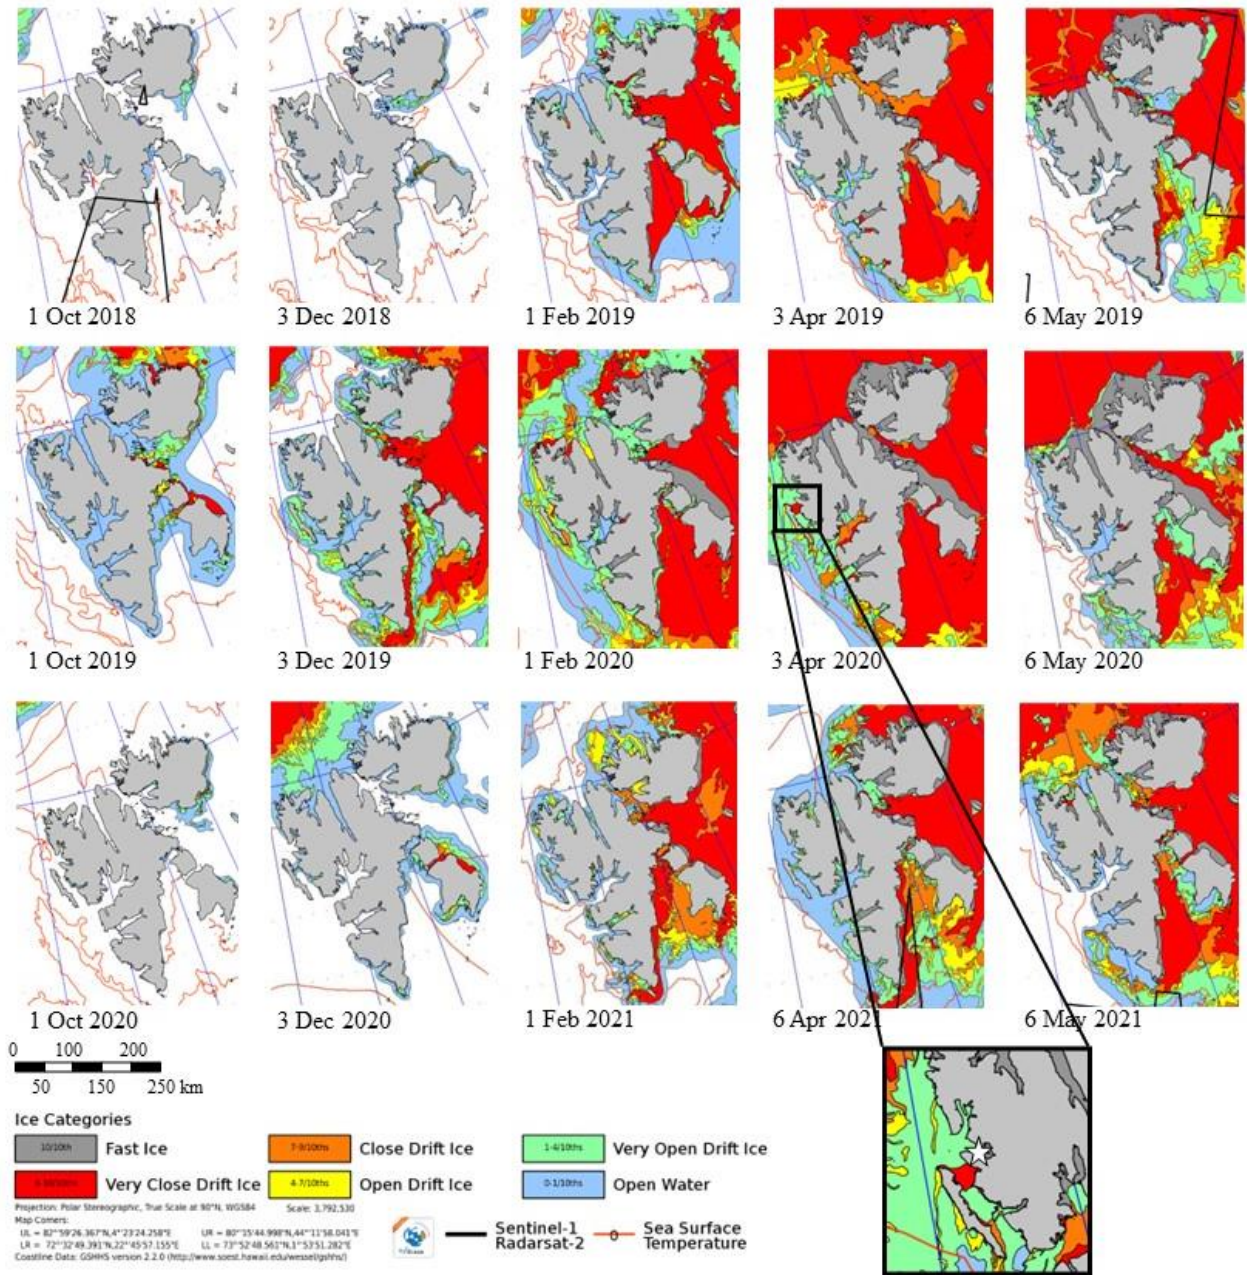

**Figure S9.** Norwegian Meteorological Institute ice charts show the seasonal sea ice expansion and contraction during the considered time-window (2018-19, 2019-20, 2020-21). A very close drift ice with respect to the coastal area of sampling (Ny-Ålesund) appears evident in the snapshot of the 3<sup>rd</sup> of April.
